1 **Structural insights into secretory immunoglobulin A and its interaction with a**  
2 **pneumococcal adhesin**

3

4 Running title: Cryo-EM structures of Fc $\alpha$ -J-SC and Fc $\alpha$ -J-SC-SpsA

5

6 Yuxin Wang<sup>1,3,4</sup>†, Guopeng Wang<sup>3</sup>†, Yaxin Li<sup>1,3,4</sup>†, Hao Shen<sup>1,3,4</sup>, Huarui Chu<sup>1,3,4</sup>, Ning Gao<sup>2,3,4</sup>, Junyu

7 Xiao<sup>1,3,4</sup>\*

8

9 <sup>1</sup>State Key Laboratory of Protein and Plant Gene Research, <sup>2</sup>State Key Laboratory of Membrane Biology,

10 <sup>3</sup>School of Life Sciences, <sup>4</sup>Peking-Tsinghua Center for Life Sciences, Peking University, Beijing, China,

11 100871

12

13 †These authors contributed equally to this work

14

15 \*Correspondence and requests for materials should be addressed to J.X. ([junyuxiao@pku.edu.cn](mailto:junyuxiao@pku.edu.cn))

16 **Abstract**

17           Secretory Immunoglobulin A (SIgA) is the most abundant antibody at the mucosal surface. SIgA  
18 possesses two additional subunits besides IgA: the joining chain (J-chain) and secretory component (SC). SC  
19 is the ectodomain of the polymeric immunoglobulin receptor (pIgR), which functions to transport IgA to the  
20 mucosa. The underlying mechanism of how the J-chain and pIgR/SC facilitates the assembly and secretion  
21 of SIgA remains to be understood. During the infection of *Streptococcus pneumoniae*, a pneumococcal  
22 adhesin SpsA hijacks SIgA and unliganded pIgR/SC to evade host defense and gain entry to human cells.  
23 How SpsA specifically targets SIgA and pIgR/SC also remains unclear. Here we report a cryo-electron  
24 microscopy structure of the Fc region of human IgA1 (Fc $\alpha$ ) in complex with J-chain and SC (Fc $\alpha$ -J-SC),  
25 which reveals the organization principle of SIgA. We also present the structure of Fc $\alpha$ -J-SC in complex with  
26 SpsA, which uncovers the specific interaction between SpsA and human pIgR/SC. These results advance the  
27 molecular understanding of SIgA and shed light on the pathogenesis of *S. pneumoniae*.

## 28 **Introduction**

29 The mucous membrane covers ~400 m<sup>2</sup> surface of internal organs in the human body.

30 Immunoglobulin A (IgA) is the most predominant antibody present at the mucosa <sup>1</sup>. In contrast to IgA in  
31 serum that is mostly monomeric, mucosal IgA are mainly present as dimers (dIgA), in which two IgA  
32 molecules are linked together by another protein designated the joining chain (J-chain) <sup>2</sup>. The J-chain is also  
33 present in the IgM pentamer (pIgM) and facilitates its assembly <sup>3</sup>. The heavy chains of IgA and IgM contain  
34 unique C-terminal extensions known as the tailpieces, which are essential for their oligomerization and  
35 covalent linkage to the J-chain <sup>4-6</sup>. Furthermore, an additional polypeptide called the secretory component  
36 (SC) is present in mucosal IgA and IgM, and such IgA and IgM complexes are often referred to as secretory  
37 IgA and IgM (SIgA and SIgM). SC is the ectodomain of the polymeric immunoglobulin receptor (pIgR),  
38 which functions to transport dIgA and pIgM through the mucosal epithelial cells <sup>7-10</sup>. SIgA forms a critical  
39 first line of defense against pathogens at the mucosal surface, and also likely plays an important role in  
40 regulating the homeostasis of microbiota <sup>11,12</sup>. SIgA in breast milk is important for protecting the newborn  
41 babies until their own immune systems have developed. Despite the fact that the composition of SIgA and  
42 certain details of its assembly process have long been established, the three-dimensional structure of SIgA  
43 has remained elusive.

44 Due to the critical function of SIgA in immune defenses, various pathogens have developed  
45 strategies to disrupt its function. *Streptococcus pneumoniae*, also known as pneumococcus, is a Gram-  
46 positive bacterium that causes millions of deaths worldwide <sup>13,14</sup>. It is an opportunistic pathogen residing in  
47 the upper respiratory tract of many people especially young children. In individuals with a weak immune  
48 system, the bacterium can invade a wide range of organs including the brain, causing severe diseases such as  
49 pneumonia, sepsis, and meningitis. *S. pneumoniae* SIgA binding protein (SpsA; also known as CbpA, PspC)

50 is a pneumococcal adhesin that binds to SIgA<sup>15</sup>. The binding is mediated by SC, and may impair the  
51 bacterial clearance function of SIgA. Furthermore, SpsA also interacts with unliganded SC and pIgR, and the  
52 interaction with pIgR may enhance bacterial adherence and importantly, facilitate its cellular invasion<sup>16</sup>.  
53 How SpsA selectively recognizes human pIgR/SC remains to be characterized.

54 Here we report a cryo-electron microscopy (cryo-EM) structure of the human Fc $\alpha$ -J-SC complex at  
55 3.2 Å resolution. Comparison of this structure with that of Fc $\mu$ -J-SC<sup>17</sup> reveals a more complete structure of  
56 the J-chain and distinctive features for the interactions between Fc $\alpha$ , J-chain, and SC. We also investigated  
57 the interaction between SIgA and the *S. pneumoniae* adhesin SpsA, and determined a cryo-EM structure of  
58 human Fc $\alpha$ -J-SC in complex with the N-terminal domain of SpsA, which shows how human pIgR/SC is  
59 specifically exploited by SpsA to promote *S. pneumoniae* pathogenesis.

60

## 61 **Results**

### 62 **Overall structure of the Fc $\alpha$ -J-SC complex**

63 We co-expressed human IgA1-Fc (Fc $\alpha$ ) with J-chain in HEK293F cells and isolated the complex  
64 containing the dimeric Fc $\alpha$ . SC was individually expressed and purified, and then incubated with the Fc $\alpha$ -J  
65 sample to form the Fc $\alpha$ -J-SC tripartite complex. We then determined its structure at 3.2 Å resolution (as  
66 judged by the FSC 0.143 criterion) by the single particle cryo-EM method (Fig. 1 and Supplementary  
67 information, Fig. S1). Most regions of the EM map exhibited atomic resolutions, allowing unambiguous  
68 structural assignment and analyses (Supplementary information, Fig. S1e and Fig. S2). The statistics for  
69 cryo-EM data collection and processing, as well as structural refinement and validation, are summarized in  
70 Supplementary information, Table S1.

71 The two IgA molecules in SIgA are linked via Cys471-mediated disulfide bonds between each other  
72 and to the J-chain. Earlier EM analyses show that dIgA displays a double-Y-like shape<sup>18</sup>. Solution scattering  
73 studies suggest that the two Fc regions do not dock to each other in a straight manner in the IgA dimer, but  
74 adopt a slightly bent end-to-end arrangement<sup>19</sup>. Consistently, our structure shows that the Fc $\alpha$  dimer has a  
75 boomerang-like shape (Fig. 2a) and resembles a portion of the pIgM structure we determined recently<sup>17</sup> (Fig.  
76 2b). Each tailpiece of Fc $\alpha$  contains a  $\beta$ -strand, like that of Fc $\mu$  in IgM, and the four tailpiece strands bundle  
77 together to mediate the interactions between the two Fc $\alpha$  molecules. The dimeric structure is further  
78 stabilized by the J-chain.

79

#### 80 **Interaction between IgA and the J-chain**

81 Compared to the J-chain in the Fc $\mu$ -J complex, a more complete structure of the J-chain is present in  
82 Fc $\alpha$ -J, due to more extensive interactions between the J-chain and the Fc $\alpha$  dimer. Residues 70-92, disordered  
83 in the Fc $\mu$ -J-SC structure, form a  $\beta$ -hairpin ( $\beta$ 5- $\beta$ 6 hairpin) that interacts with Fc $\alpha$ 2 (Fig. 2a and Fig. 3a).  
84 Three intrachain disulfide bridges are present within the J-chain (Cys12<sup>J</sup>-Cys100<sup>J</sup>, Cys71<sup>J</sup>-Cys91<sup>J</sup>, and  
85 Cys108<sup>J</sup>-Cys133<sup>J</sup>; superscript J indicates J-chain residues), consistent with previous analyses<sup>20,21</sup>. Cys14<sup>J</sup>  
86 and Cys68<sup>J</sup> form a disulfide bond with Cys471<sup>Fc $\alpha$ 2B</sup> and Cys471<sup>Fc $\alpha$ 1A</sup>, respectively.

87 The central region of the J-chain contains four  $\beta$ -strands ( $\beta$ 1- $\beta$ 4) that interact with the Fc $\alpha$  tailpieces  
88 (Fig. 3a). Strands  $\beta$ 1- $\beta$ 3 pack onto the two tailpiece strands of Fc $\alpha$ 2 to assemble into a  $\beta$ -sheet, with  
89 hydrogen bonds formed between main chain atoms of adjacent strands; whereas  $\beta$ 4 packs onto the tailpiece  
90 strands of Fc $\alpha$ 1. Robust hydrophobic interactions are present between the two  $\beta$ -sheets, mediated by  
91 Fc $\alpha$  residues Val460, Val462, Met464 and J-chain residues Ile37<sup>J</sup>, Ile39<sup>J</sup>, Val41<sup>J</sup>, Phe60<sup>J</sup>, Tyr62<sup>J</sup> (Fig. 3b).  
92 The  $\beta$ 2- $\beta$ 3 loop,  $\beta$ 3- $\beta$ 4 loop,  $\beta$ 5- $\beta$ 6 hairpin, and the long C-terminal hairpin of the J-chain function as four

93 lassos that assist to further interact with Fc $\alpha$ 1 and Fc $\alpha$ 2. The  $\beta$ 2- $\beta$ 3 loop interacts with the C $\alpha$ 3-tailpiece  
94 junction of Fc $\alpha$ 2B (Supplementary information, Fig. S3a). Ile21<sup>J</sup> and Val33<sup>J</sup>, together with Ile5<sup>J</sup> and Leu7<sup>J</sup> in  
95 the N-terminal region of the J-chain, form a hydrophobic pocket to accommodate Leu451<sup>Fc $\alpha$ 2B</sup>. Asp31<sup>I</sup> forms  
96 a salt bridge with Arg450<sup>Fc $\alpha$ 2B</sup>. The  $\beta$ 3- $\beta$ 4 loop contacts the C $\alpha$ 3-tailpiece junction of Fc $\alpha$ 1A (Supplementary  
97 information, Fig. S3b). Arg46<sup>J</sup> forms an ion pair with Asp449<sup>Fc $\alpha$ 1A</sup>. Leu56<sup>J</sup> packs on Leu451<sup>Fc $\alpha$ 1A</sup>. More  
98 prominent interactions with Fc $\alpha$  are mediated by the  $\beta$ 5- $\beta$ 6 and C-terminal hairpins of the J-chain. The  $\beta$ 5-  
99  $\beta$ 6 hairpin forms extensive interactions with the C $\alpha$ 2-C $\alpha$ 3 junction of Fc $\alpha$ 2B via two hydrophobic centers  
100 (Fig. 3c). The first is formed between J-chain residues Val76<sup>J</sup>, Leu78<sup>J</sup>, Val83<sup>J</sup>, and Fc $\alpha$ 2B residues  
101 Leu258<sup>Fc $\alpha$ 2B</sup>, Arg382<sup>Fc $\alpha$ 2B</sup> aliphatic side chain, Leu384<sup>Fc $\alpha$ 2B</sup>, Met433<sup>Fc $\alpha$ 2B</sup>, Phe443<sup>Fc $\alpha$ 2B</sup>. The second  
102 hydrophobic center focuses on Thr86<sup>J</sup>, which is surrounded by Leu439<sup>Fc $\alpha$ 2B</sup>, Pro440<sup>Fc $\alpha$ 2B</sup>, and Leu441<sup>Fc $\alpha$ 2B</sup>.  
103 Several hydrogen bonds are also formed between the J-chain and Fc $\alpha$ 2B at this region, involving Asp79<sup>J</sup>,  
104 Thr86<sup>J</sup>, Asn89<sup>Fc $\alpha$ 2B</sup>, Val349<sup>Fc $\alpha$ 2B</sup>, Glu389<sup>Fc $\alpha$ 2B</sup>, and Phe443<sup>Fc $\alpha$ 2B</sup>. The C-terminal hairpin targets almost the  
105 same region in Fc $\alpha$ 1A (Fig. 3d). Val113<sup>J</sup>, Leu115<sup>J</sup>, Tyr117<sup>J</sup>, Val124<sup>J</sup>, and Thr126<sup>J</sup> mingle with Leu258<sup>Fc $\alpha$ 1A</sup>,  
106 Arg382<sup>Fc $\alpha$ 1A</sup>, Leu384<sup>Fc $\alpha$ 1A</sup>, Met433<sup>Fc $\alpha$ 1A</sup>, and Phe443<sup>Fc $\alpha$ 1A</sup>. Ala127<sup>J</sup>, Cys133<sup>J</sup>, Tyr134<sup>J</sup>, and Pro135<sup>J</sup> encircle  
107 Pro440<sup>Fc $\alpha$ 1A</sup> and Leu441<sup>Fc $\alpha$ 1A</sup>. The way that the C-terminal hairpin is attached to Fc $\alpha$ 1A highly resembles  
108 how it binds to Fc $\mu$ 1 in IgM (Fig. 2a, 2b).

109

## 110 **Interaction between dIgA and SC**

111 The interaction between dIgA and pIgR/SC has been extensively studied by biochemical and  
112 biophysical studies<sup>22-28</sup>. pIgR/SC forms a bidentate interaction with dIgA, with both its D1 and D5 domain  
113 involved. The D1 domain of pIgR/SC binds to Fc $\alpha$ -J using its three CDR (complementarity determining  
114 regions) loops, and the molecular interactions are in many ways similar to the interactions seen in the Fc $\mu$ -J-

115 SC complex<sup>17</sup>. CDR1 mainly contacts the J-chain (Fig. 4a). Val29<sup>SC</sup> (superscript SC indicates pIgR/SC  
116 residues) is positioned in a pocket formed by J-chain residues Arg105<sup>J</sup>, Asn106<sup>J</sup>, and A132<sup>J</sup> to mediate  
117 hydrophobic/van der Waals interactions. Asn30<sup>SC</sup> coordinates Arg105<sup>J</sup>. Arg31<sup>SC</sup> interacts with Asp136<sup>J</sup>.  
118 His32<sup>SC</sup> packs against Tyr134<sup>J</sup>. Besides these interactions with the J-chain, pIgR/SC also directly interacts  
119 with IgA at several places (Fig. 4b). For example, Arg34<sup>SC</sup> in CDR1 forms a salt bridge with Glu363<sup>Fc $\alpha$ 1B</sup>, the  
120 aliphatic side chain of which also packs on Tyr55<sup>SC</sup> in CDR2. The main chain carbonyl of Cys46<sup>SC</sup> forms a  
121 hydrogen bond with Asn362<sup>Fc $\alpha$ 1B</sup>. Glu53<sup>SC</sup> interacts with Arg346<sup>Fc $\alpha$ 1A</sup>. Gly54<sup>SC</sup> is covered by Phe345<sup>Fc $\alpha$ 1A</sup> and  
122 Thr408<sup>Fc $\alpha$ 1A</sup>. Arg99<sup>SC</sup> and Leu101<sup>SC</sup> in CDR3 encloses Tyr472<sup>Fc $\alpha$ 2B</sup>, the terminal residue of Fc $\alpha$ 2B, together  
123 with Arg105<sup>J</sup> (Fig. 4a). Two SC mutants, V29N/R31S and R99N/L101T, which display greatly reduced  
124 interactions with the Fc $\mu$ -J complex<sup>17</sup>, also failed to bind Fc $\alpha$ -J (Fig. 4c).

125 The interaction between dIgA and pIgR/SC also uniquely involves the D5 domain of pIgR/SC, and a  
126 disulfide bond is formed between Cys468<sup>SC</sup> and Cys311 in the C $\alpha$ 2 domain IgA<sup>23</sup>. Indeed, although in the  
127 two determined structures of IgA<sup>29,30</sup>, Cys311 is present in a hydrophobic pocket and not exposed,  
128 Cys311<sup>Fc $\alpha$ 2B</sup> flips out in the Fc $\alpha$ -J-SC complex and is located in close proximity to Cys468<sup>SC</sup> (Fig. 4d). A  
129 disulfide bridge can be readily formed between them. Nevertheless, mutation of C468<sup>SC</sup> only slightly  
130 decreased the binding between Fc $\alpha$ -J and SC in solution (Fig. 4c). This is consistent with previous analyses  
131 showing that the initial and primary association of dIgA with pIgR is mediated by interactions at the pIgR-  
132 D1 domain. Disulfide formation between dIgA and Cys468<sup>SC</sup> is a late event during transcytosis, and is likely  
133 facilitated by the protein disulfide isomerases in secretory vesicles<sup>31</sup>. The main function of this disulfide  
134 bond is to increase the stability of SIgA in the harsh environment of mucosal surfaces and external fluids.

135

136 **Interaction between SC and *S. pneumoniae* SpsA**

137 SpsA comprises a C-terminal phosphorylcholine-binding domain that interacts with pneumococcal  
138 cell wall to function in bacterial colonization, and an N-terminal domain (NTD) that recruits host proteins  
139 including pIgR/SC<sup>15,32</sup>. SpsA<sup>NTD</sup> contains repeats of the leucine zipper motifs termed R1 and R2, each  
140 adopting a three-helix bundle structure<sup>33</sup>. The YRNYPT hexapeptide motif involved in binding to pIgR/SC  
141 is located in the loop between helices  $\alpha 1$  and  $\alpha 2$  in the R1 motif. To reveal the molecular mechanism  
142 underlying the specific recognition of SIgA by SpsA, we reconstituted a Fc $\alpha$ -J-SC-SpsA<sup>NTD</sup> quadruple  
143 complex and determined the cryo-EM structure at an overall resolution of 3.3 Å (Supplementary  
144 information, Figs. S1 and S4, Table S1). The  $\alpha 1$ - $\alpha 2$  loop of SpsA<sup>NTD</sup>, especially the YRNYPT hexapeptide  
145 motif, displays high-quality densities and can be clearly resolved (Supplementary information, Fig. S4b).

146 SpsA<sup>NTD</sup> specifically interacts with the D3-D4 domains of human pIgR/SC<sup>34,35</sup>. In the cryo-EM  
147 structure, the  $\alpha 1$ - $\alpha 2$  loop of SpsA<sup>NTD</sup> docks into a pocket at the D3-D4 junction (Fig. 5a), formed by the DE  
148 loop of D3 and the C-C' strands of D4. Notably, this pocket is only present in the ligand-bound conformation  
149 of SC<sup>17</sup>. Tyr198, the first residue in the YRNYPT motif, forms a hydrogen bond with Tyr365<sup>SC</sup> (Fig. 5b).  
150 Arg199 packs on Trp386<sup>SC</sup>, and form a salt bridge with Asp382<sup>SC</sup>. Asn200 forms a hydrogen bond with  
151 Arg376<sup>SC</sup>. Tyr201 packs on Pro283<sup>SC</sup>. Pro202 is surrounded by hydrophobic residues including Tyr365<sup>SC</sup>,  
152 Cys367<sup>SC</sup>, Cys377<sup>SC</sup>, Leu379<sup>SC</sup>, and Leu424<sup>SC</sup>. Substitution of Tyr201 with an Asp or Pro202 with a Glu  
153 abolished the binding of SpsA to SIgA<sup>36</sup>. Thr203 interacts with Asn282<sup>SC</sup>. Notably, most of the SC residues  
154 described here are not conserved in pIgR/SC from other species (Supplementary information, Fig. S5),  
155 explaining the fact that SpsA only binds to human SIgA and pIgR/SC<sup>36</sup>. Besides the interactions mediated  
156 by residues in the YRNYPT motif, Tyr206 forms a hydrogen bond with the main chain carbonyl group of  
157 Pro283<sup>SC</sup>, and Arg265 in helix  $\alpha 3$  appears to hydrogen bond with the main chain carbonyl of Asp285<sup>SC</sup> (Fig.  
158 5b). These interactions further strengthen the binding between SpsA and SC.



159

## 160 **Discussion**

161 SIgA is of paramount importance to mucosal immunity. In adults, the daily synthesis of IgA is  
162 greater than all other types of antibody combined, and most of these IgA molecules are present in mucosal  
163 secretions in the form of dimeric SIgA. Despite the long history of SIgA research, its structure has remained  
164 elusive until only recently. During the preparation of this manuscript, the cryo-EM structures of SIgA have  
165 been published by Genentech<sup>37</sup>. Our independent work reveals an architecture very similar to the dimeric  
166 SIgA core reported in this study, corroborating the reliability of these structures. IgA can induce immune  
167 signaling by binding to the IgA-specific receptor Fc $\alpha$ RI/CD89<sup>38,39</sup>. It is not entirely clear whether  
168 monomeric IgA and SIgA can elicit similar immune responses. Crystal structure study reveals a 2:1  
169 Fc $\alpha$ RI:Fc $\alpha$  complex<sup>29</sup> (Fig. 6a). In secretory IgA, when the J-chain is present, only one side of the Fc $\alpha$ RI-  
170 binding site would be exposed in each Fc $\alpha$  (Fig. 6b). The other side is occupied by the J-chain and not  
171 available for binding. From a structural point of view, there is no apparent reason to think that SIgA would  
172 not bind to Fc $\alpha$ RI; nevertheless, it would have to bind membrane-bound Fc $\alpha$ RI molecules in a different  
173 arrangement. Whether this altered mode of binding may account for the different immune responses elicited  
174 by monomeric IgA and SIgA remains to be investigated<sup>40</sup>. Recently, human Fc receptor-like 3 (FCRL3) has  
175 been identified as a SIgA-specific receptor<sup>41</sup>. It is likely that the J-chain and SC are involved in the  
176 interaction between SIgA and FCRL3, thereby contributing to the signaling function of SIgA.

177 *S. pneumoniae* is an important human pathogen. SpsA/CbpA/PspC is a major adhesin of *S.*  
178 *pneumoniae* and plays a role during its infection. Despite the fact that the DNA region encoding SpsA is  
179 highly polymorphic, the YRNYPT hexapeptide involved in binding to pIgR/SC is highly conserved, present  
180 in one or two copies in more than 70% strains of *S. pneumoniae*<sup>15,42</sup>. In tissue culture models, SpsA-deficient

181 *S. pneumoniae* showed greatly reduced ability to adhere to, and abolished activity to invade human cells<sup>16,32</sup>.  
182 Notably, SpsA evolves to bind to human pIgR/SC specifically, since it does not interact with SIgA and SC  
183 from common laboratory animals including mouse, rat, rabbit, and guinea pig<sup>36</sup>. Indeed, residues in pIgR/SC  
184 that participate in the interaction with SpsA are not conserved in these animals (Supplementary information,  
185 Fig. S5). These differences underscore the fact that *S. pneumoniae* is a human-specific pathogen and should  
186 be taken into consideration for the study of *S. pneumoniae* pathogenesis. On the other hand, the unique  
187 property of SpsA to bind human SC with high selectivity and affinity may allow the development of  
188 recombinant SpsA protein as a tool for efficient isolation and purification of human SIgA and SIgM.

## 189 **Materials and Methods**

### 190 **Protein expression and purification**

191 The DNA fragment encoding IgA1-Fc (residues 241-472) was cloned into a modified pcDNA vector with  
192 a N-terminal IL-2 signal peptide followed by a twin-strep tag. The DNA fragments encoding the full-length J-  
193 chain and SC were previously described<sup>17</sup>. HEK293F cells were cultured in SMM 293T-I medium (Sino  
194 Biological Inc.) at 37 °C, with 5% CO<sub>2</sub> and 55% humidity. The two plasmids expressing IgA1-Fc and J-chain  
195 were co-transfected into the cells using polyethylenimine (Polysciences). Four days after transfection, the  
196 conditioned media were collected by centrifugation, concentrated using a Hydrosart Ultrafilter (Sartorius), and  
197 exchanged into the binding buffer (25 mM Tris-HCl, pH 7.4, 150 mM NaCl). The recombinant proteins were  
198 isolated using Ni-NTA affinity purification and eluted with the binding buffer supplemented with 500 mM  
199 imidazole. The Fc $\alpha$ -J complex was further purified using a Superdex 200 increase column (GE Healthcare)  
200 and eluted using the binding buffer. SC was expressed and purified as previously described<sup>17</sup>. To obtain the  
201 Fc $\alpha$ -J-SC tripartite complex, purified Fc $\alpha$ -J and SC were mixed in an 1:2 molar ratio and incubated on ice for  
202 1 h. The complex was then further purified on a Superdex 200 increase column and eluted using the binding  
203 buffer.

204 The DNA fragment encoding SpsA<sup>NTD</sup> (residues 38-324) was synthesized by Synbio Technologies and  
205 cloned into a modified pQlink vector with a N-terminal 8 $\times$ His tag. SpsA<sup>NTD</sup> was expressed in  
206 BL21(DE3)pLysS *E. coli*. The *E. coli* culture was grown in the Luria-Bertani medium at 37 °C to an OD<sub>600</sub>  
207 of 0.8, and then induced with 0.5 mM isopropyl  $\beta$ -D-1-thiogalactopyranoside at 18 °C overnight for protein  
208 expression. The cells were collected by centrifugation, resuspended in the lysis buffer (50 mM Tris-HCl, pH  
209 8.0, 300 mM NaCl, 1 mM phenylmethylsulfonyl fluoride), and then disrupted by sonication. The insoluble  
210 debris was removed by centrifugation. The recombinant protein was isolated using Ni-NTA affinity

211 purification following standard procedure and eluted with 50 mM Tris-HCl, pH 8.0, 300 mM NaCl, and 500  
212 mM imidazole. SpsA<sup>NTD</sup> was then further purified by gel filtration chromatography using a Superdex 200  
213 increase column (GE Healthcare) and eluted using the binding buffer. To obtain the Fc $\alpha$ -J-SC-SpsA<sup>NTD</sup>  
214 quadruple complex, purified Fc $\alpha$ -J-SC and SpsA<sup>NTD</sup> were mixed in an 1:2 molar ratio and incubated on ice for  
215 1 h. The complex was then purified again on a Superdex 200 increase column and eluted using the binding  
216 buffer.

217

### 218 **Negative-staining and cryo-electron microscopy**

219 The samples for EM study were prepared as previously described<sup>17</sup>. All EM grids were evacuated for 2  
220 minutes and glow-discharged for 30 seconds using a plasma cleaner (Harrick PDC-32G-2). For the negative-  
221 staining study, four-microliter aliquots of the Fc $\alpha$ -J-SC complex at 0.03 mg/ml were applied to glow-  
222 discharged carbon-coated copper grids (Zhong Jing Ke Yi, Beijing). After ~40 s, excessive liquid was removed  
223 using a filter paper (Whatman No. 1). The grid was then immediately stained using 2% uranyl acetate for 10 s  
224 and air dried. The grids were examined on a Tecnai G2 20 Twin electron microscope (FEI) operated at 120  
225 kV. Images were recorded using a 4k  $\times$  4k CCD camera (Eagle, FEI). The Fc $\alpha$ -J-SC-SpsA<sup>NTD</sup> sample was  
226 stained and examined similarly.

227 To prepare the sample for cryo-EM analyses, four-microliter aliquots of Fc $\alpha$ -J-SC (0.3 mg/ml) or  
228 Fc $\alpha$ -J-SC-SpsA<sup>NTD</sup> (0.2 mg/ml) were applied to glow-discharged holy-carbon gold grids (Quantifoil,  
229 R1.2/1.3), blotted with filter paper at 4 °C and 100% humidity, and plunged into the liquid ethane using a  
230 Vitrobot Mark IV (FEI). Grids screening was performed using a Talos Arctica microscope equipped with  
231 Ceta camera (FEI). Data collection was carried out using a Titan Krios electron microscope (FEI) operated at  
232 300 kV. Movies were recorded on a K2 Summit direct electron detector (Gatan) in a super resolution mode

233 using the SerialEM software <sup>43</sup>. A nominal magnification of 165,000X was used, and the exposure rate was  
234 11.668 electrons per Å<sup>2</sup> per second. The slit width of the energy filter was set to 20 eV. The defocus range  
235 was set from -0.8 to -1.6 μm. The micrographs were dose-fractioned into 32 frames with a total exposure  
236 time of 5.12 s and a total electron exposure of 60 electrons per Å<sup>2</sup>. Statistics for data collection are  
237 summarized in Supplementary information, Table S1.

238

### 239 **Imaging processing**

240 For 3D reconstruction of the Fcα-J-SC complex, a total of 16,264 movie stacks were recorded. Raw  
241 movies frames were aligned and averaged into motion-corrected summed images with a pixel size of 0.828 Å  
242 by MotionCor2 <sup>44</sup>. The contrast transfer function (CTF) parameters of each motion-corrected image were  
243 estimated by the Gctf program (v1.06) <sup>45</sup>. Relion (v3.07) was used for all the following data processing <sup>46</sup>.  
244 Manual screening was performed to remove low-quality images. A set of 475 particles were manually picked  
245 and subjected to 2D classification to generate templates for automatic particle picking. A total of 6,875,153  
246 particles were then auto-picked, which were subjected to another round of 2D classification, resulting in  
247 5,051,275 particles that were kept for the subsequent 3D classifications. Initial model was generated using  
248 Relion and used as a reference for 3D classification. Three of the six classes (665,589 particles) from the  
249 final round of 3D classification were selected and combined for refinement, resulting in a map with a 3.23 Å  
250 overall resolution after mask-based post-processing. Finally, Bayesian Polishing and CTF Refinement were  
251 applied, which yielded a density map at a resolution of 3.15 Å, based on the gold-standard FSC 0.143  
252 criteria. The local resolution map was analyzed using ResMap <sup>47</sup> and displayed using UCSF Chimera <sup>48</sup>.  
253 Similar data processing strategies were used for the Fcα-J-SC-SpsA complex. The workflows of data  
254 processing are illustrated in Supplementary information, Figure S1.

255

## 256 **Model building and structure refinement**

257           The structure of Fc $\alpha$  (PDB ID: 1OW0), as well as the structures of the J-chain and SC from the Fc $\mu$ -  
258 J-SC complex (PDB ID: 6KXS), was docked into the EM map using Phenix<sup>49</sup> and then manually adjusted  
259 using Coot<sup>50</sup>. The  $\beta$ 5- $\beta$ 6 hairpin of the J-chain, which is disordered in the Fc $\mu$ -J-SC structure, was built de  
260 novo. The SpsA<sup>NTD</sup> structure was also built de novo, using the previously determined solution structure of  
261 the R2 domain (PDB ID: 1W9R) as a reference. Residues in helices  $\alpha$ 1- $\alpha$ 2 of SpsA<sup>NTD</sup> can be  
262 unambiguously assigned. The amino acid registrations in helix  $\alpha$ 3 are not entirely reliable, since this helix is  
263 only loosely attached to SC and displays poor densities due to structural flexibility. Refinement was  
264 performed using the real-space refinement in Phenix. Figures were prepared with Pymol (Schrödinger) and  
265 UCSF Chimera.

266

## 267 **StrepTactin pull-down assay**

268           WT and mutant SC proteins were purified using the Ni-NTA affinity method as previously described<sup>17</sup>.  
269 For the pull-down experiments, they were first incubated with purified Fc $\alpha$ -J complex on ice for 1 h. The  
270 mixture was then incubated with the StrepTactin beads (Smart Lifesciences) in the binding buffer at 4 °C for  
271 another hour. A twin-strep tag is present on Fc $\alpha$ . The beads were spun down and then washed three times with  
272 the binding buffer. The bound proteins were eluted off the beads using the binding buffer supplemented with  
273 10 mM desthiobiotin. The results were analyzed by SDS-PAGE and visualized by Coomassie staining.

274

275 **Acknowledgments**

276 We thank the Core Facilities at the School of Life Sciences, Peking University for help with negative-  
277 staining EM; the Cryo-EM Platform of Peking University for help with data collection; the High-  
278 performance Computing Platform of Peking University for help with computation; the National Center for  
279 Protein Sciences at Peking University for assistance with Amersham Imager; and Guilan Li for help with  
280 cDNA library. The work was supported by the National Key Research and Development Program of China  
281 (2017YFA0505200, 2016YFC0906000 to J.X.; 2019YFA0508904 to N.G.), the National Science  
282 Foundation of China (31570735, 31822014 to J.X.; 31725007, 31630087 to N.G.), the Qidong-SLS  
283 Innovation Fund to J.X. and N.G.; and the Clinical Medicine Plus X Project of Peking University to J.X.

284

285 **Author contributions:** Y.W. and Y.L. performed protein purification and biochemical experiments. Y.W.  
286 and G.W. prepared the cryo-EM sample and collected data. G.W. processed the cryo-EM data, under the  
287 supervision of N.G. J.X. built the structural model and wrote the manuscript, with inputs from all authors.

288

289 **Conflict of Interests:** The authors declare no competing financial interests.

290

291 **Data availability:** The cryo-EM maps and atomic coordinates of the Fc $\alpha$ -J-SC and Fc $\alpha$ -J-SC-SpsA  
292 complexes will be deposited in the EMDB and PDB, respectively.

293

294 **Reference:**

- 295 1 Chodirker, W. B. & Tomasi, T. B., Jr. Gamma-Globulins: Quantitative Relationships in Human  
296 Serum and Nonvascular Fluids. *Science* **142**, 1080-1081, doi:10.1126/science.142.3595.1080 (1963).
- 297 2 Halpern, M. S. & Koshland, M. E. Noval subunit in secretory IgA. *Nature* **228**, 1276-1278,  
298 doi:10.1038/2281276a0 (1970).
- 299 3 Mestecky, J., Zikan, J. & Butler, W. T. Immunoglobulin M and secretory immunoglobulin A:  
300 presence of a common polypeptide chain different from light chains. *Science* **171**, 1163-1165,  
301 doi:10.1126/science.171.3976.1163 (1971).
- 302 4 Koshland, M. E. The coming of age of the immunoglobulin J chain. *Annu Rev Immunol* **3**, 425-453,  
303 doi:10.1146/annurev.iy.03.040185.002233 (1985).
- 304 5 Tomasi, T. B. The discovery of secretory IgA and the mucosal immune system. *Immunol Today* **13**,  
305 416-418, doi:10.1016/0167-5699(92)90093-M (1992).
- 306 6 Woof, J. M. & Mestecky, J. Mucosal immunoglobulins. *Immunol Rev* **206**, 64-82,  
307 doi:10.1111/j.0105-2896.2005.00290.x (2005).
- 308 7 Mostov, K. E., Kraehenbuhl, J. P. & Blobel, G. Receptor-mediated transcellular transport of  
309 immunoglobulin: synthesis of secretory component as multiple and larger transmembrane forms.  
310 *Proc Natl Acad Sci U S A* **77**, 7257-7261, doi:10.1073/pnas.77.12.7257 (1980).
- 311 8 Brandtzaeg, P. & Prydz, H. Direct evidence for an integrated function of J chain and secretory  
312 component in epithelial transport of immunoglobulins. *Nature* **311**, 71-73, doi:10.1038/311071a0  
313 (1984).
- 314 9 Norderhaug, I. N., Johansen, F. E., Schjerven, H. & Brandtzaeg, P. Regulation of the formation and  
315 external transport of secretory immunoglobulins. *Crit Rev Immunol* **19**, 481-508 (1999).



- 316 10 Kaetzel, C. S. The polymeric immunoglobulin receptor: bridging innate and adaptive immune  
317 responses at mucosal surfaces. *Immunol Rev* **206**, 83-99, doi:10.1111/j.0105-2896.2005.00278.x  
318 (2005).
- 319 11 Pabst, O., Cerovic, V. & Hornef, M. Secretory IgA in the Coordination of Establishment and  
320 Maintenance of the Microbiota. *Trends Immunol* **37**, 287-296, doi:10.1016/j.it.2016.03.002 (2016).
- 321 12 Macpherson, A. J., Yilmaz, B., Limenitakis, J. P. & Ganal-Vonarburg, S. C. IgA Function in  
322 Relation to the Intestinal Microbiota. *Annu Rev Immunol* **36**, 359-381, doi:10.1146/annurev-  
323 immunol-042617-053238 (2018).
- 324 13 Weiser, J. N., Ferreira, D. M. & Paton, J. C. Streptococcus pneumoniae: transmission, colonization  
325 and invasion. *Nat Rev Microbiol* **16**, 355-367, doi:10.1038/s41579-018-0001-8 (2018).
- 326 14 Brooks, L. R. K. & Mias, G. I. Streptococcus pneumoniae's Virulence and Host Immunity: Aging,  
327 Diagnostics, and Prevention. *Front Immunol* **9**, 1366, doi:10.3389/fimmu.2018.01366 (2018).
- 328 15 Hammerschmidt, S., Talay, S. R., Brandtzaeg, P. & Chhatwal, G. S. SpsA, a novel pneumococcal  
329 surface protein with specific binding to secretory immunoglobulin A and secretory component. *Mol*  
330 *Microbiol* **25**, 1113-1124, doi:10.1046/j.1365-2958.1997.5391899.x (1997).
- 331 16 Zhang, J. R. *et al.* The polymeric immunoglobulin receptor translocates pneumococci across human  
332 nasopharyngeal epithelial cells. *Cell* **102**, 827-837, doi:10.1016/s0092-8674(00)00071-4 (2000).
- 333 17 Li, Y. *et al.* Structural insights into immunoglobulin M. *Science*, doi:10.1126/science.aaz5425  
334 (2020).
- 335 18 Dourmashkin, R. R., Virella, G. & Parkhouse, R. M. Electron microscopy of human and mouse  
336 myeloma serum IgA. *J Mol Biol* **56**, 207-208, doi:10.1016/0022-2836(71)90097-0 (1971).

- 337 19 Bonner, A., Furtado, P. B., Almogren, A., Kerr, M. A. & Perkins, S. J. Implications of the near-  
338 planar solution structure of human myeloma dimeric IgA1 for mucosal immunity and IgA  
339 nephropathy. *J Immunol* **180**, 1008-1018, doi:10.4049/jimmunol.180.2.1008 (2008).
- 340 20 Bastian, A., Kratzin, H., Eckart, K. & Hilschmann, N. Intra- and interchain disulfide bridges of the  
341 human J chain in secretory immunoglobulin A. *Biol Chem Hoppe Seyler* **373**, 1255-1263,  
342 doi:10.1515/bchm3.1992.373.2.1255 (1992).
- 343 21 Frutiger, S., Hughes, G. J., Paquet, N., Luthy, R. & Jaton, J. C. Disulfide bond assignment in human  
344 J chain and its covalent pairing with immunoglobulin M. *Biochemistry* **31**, 12643-12647,  
345 doi:10.1021/bi00165a014 (1992).
- 346 22 Frutiger, S., Hughes, G. J., Hanly, W. C., Kingzette, M. & Jaton, J. C. The amino-terminal domain of  
347 rabbit secretory component is responsible for noncovalent binding to immunoglobulin A dimers. *J*  
348 *Biol Chem* **261**, 16673-16681 (1986).
- 349 23 Fallgreen-Gebauer, E. *et al.* The covalent linkage of secretory component to IgA. Structure of sIgA.  
350 *Biol Chem Hoppe Seyler* **374**, 1023-1028 (1993).
- 351 24 Coyne, R. S., Siebrecht, M., Peitsch, M. C. & Casanova, J. E. Mutational analysis of polymeric  
352 immunoglobulin receptor/ligand interactions. Evidence for the involvement of multiple  
353 complementarity determining region (CDR)-like loops in receptor domain I. *J Biol Chem* **269**,  
354 31620-31625 (1994).
- 355 25 Hexham, J. M. *et al.* A human immunoglobulin (Ig)A calpha3 domain motif directs polymeric Ig  
356 receptor-mediated secretion. *J Exp Med* **189**, 747-752, doi:10.1084/jem.189.4.747 (1999).

- 357 26 Hamburger, A. E., West, A. P., Jr. & Bjorkman, P. J. Crystal structure of a polymeric  
358 immunoglobulin binding fragment of the human polymeric immunoglobulin receptor. *Structure* **12**,  
359 1925-1935, doi:10.1016/j.str.2004.09.006 (2004).
- 360 27 Lewis, M. J., Pleass, R. J., Batten, M. R., Atkin, J. D. & Woof, J. M. Structural requirements for the  
361 interaction of human IgA with the human polymeric Ig receptor. *J Immunol* **175**, 6694-6701,  
362 doi:10.4049/jimmunol.175.10.6694 (2005).
- 363 28 Stadtmueller, B. M. *et al.* The structure and dynamics of secretory component and its interactions  
364 with polymeric immunoglobulins. *Elife* **5**, doi:10.7554/eLife.10640 (2016).
- 365 29 Herr, A. B., Ballister, E. R. & Bjorkman, P. J. Insights into IgA-mediated immune responses from  
366 the crystal structures of human Fc $\alpha$ RI and its complex with IgA1-Fc. *Nature* **423**, 614-620,  
367 doi:10.1038/nature01685 (2003).
- 368 30 Ramsland, P. A. *et al.* Structural basis for evasion of IgA immunity by *Staphylococcus aureus*  
369 revealed in the complex of SSL7 with Fc of human IgA1. *Proc Natl Acad Sci U S A* **104**, 15051-  
370 15056, doi:10.1073/pnas.0706028104 (2007).
- 371 31 Chintalacharuvu, K. R. *et al.* Disulfide bond formation between dimeric immunoglobulin A and the  
372 polymeric immunoglobulin receptor during hepatic transcytosis. *Hepatology* **19**, 162-173 (1994).
- 373 32 Rosenow, C. *et al.* Contribution of novel choline-binding proteins to adherence, colonization and  
374 immunogenicity of *Streptococcus pneumoniae*. *Mol Microbiol* **25**, 819-829, doi:10.1111/j.1365-  
375 2958.1997.mmi494.x (1997).
- 376 33 Luo, R. *et al.* Solution structure of choline binding protein A, the major adhesin of *Streptococcus*  
377 *pneumoniae*. *EMBO J* **24**, 34-43, doi:10.1038/sj.emboj.7600490 (2005).

- 378 34 Lu, L., Lamm, M. E., Li, H., Corthesy, B. & Zhang, J. R. The human polymeric immunoglobulin  
379 receptor binds to *Streptococcus pneumoniae* via domains 3 and 4. *J Biol Chem* **278**, 48178-48187,  
380 doi:10.1074/jbc.M306906200 (2003).
- 381 35 Elm, C. *et al.* Ectodomains 3 and 4 of human polymeric Immunoglobulin receptor (hPIgR) mediate  
382 invasion of *Streptococcus pneumoniae* into the epithelium. *J Biol Chem* **279**, 6296-6304,  
383 doi:10.1074/jbc.M310528200 (2004).
- 384 36 Hammerschmidt, S., Tillig, M. P., Wolff, S., Vaerman, J. P. & Chhatwal, G. S. Species-specific  
385 binding of human secretory component to SpsA protein of *Streptococcus pneumoniae* via a  
386 hexapeptide motif. *Mol Microbiol* **36**, 726-736, doi:10.1046/j.1365-2958.2000.01897.x (2000).
- 387 37 Kumar, N., Arthur, C. P., Ciferri, C. & Matsumoto, M. L. Structure of the secretory immunoglobulin  
388 A core. *Science*, doi:10.1126/science.aaz5807 (2020).
- 389 38 van Egmond, M. *et al.* IgA and the IgA Fc receptor. *Trends Immunol* **22**, 205-211,  
390 doi:10.1016/s1471-4906(01)01873-7 (2001).
- 391 39 Monteiro, R. C. & Van De Winkel, J. G. IgA Fc receptors. *Annu Rev Immunol* **21**, 177-204,  
392 doi:10.1146/annurev.immunol.21.120601.141011 (2003).
- 393 40 van Egmond, M. *et al.* Fc $\alpha$ RI-positive liver Kupffer cells: reappraisal of the function of  
394 immunoglobulin A in immunity. *Nat Med* **6**, 680-685, doi:10.1038/76261 (2000).
- 395 41 Agarwal, S. *et al.* Human Fc Receptor-like 3 Inhibits Regulatory T Cell Function and Binds  
396 Secretory IgA. *Cell Rep* **30**, 1292-1299 e1293, doi:10.1016/j.celrep.2019.12.099 (2020).
- 397 42 Iannelli, F., Oggioni, M. R. & Pozzi, G. Allelic variation in the highly polymorphic locus pspC of  
398 *Streptococcus pneumoniae*. *Gene* **284**, 63-71, doi:10.1016/s0378-1119(01)00896-4 (2002).

- 399 43 Mastronarde, D. N. Automated electron microscope tomography using robust prediction of specimen  
400 movements. *J Struct Biol* **152**, 36-51, doi:10.1016/j.jsb.2005.07.007 (2005).
- 401 44 Zheng, S. Q. *et al.* MotionCor2: anisotropic correction of beam-induced motion for improved cryo-  
402 electron microscopy. *Nat Methods* **14**, 331-332, doi:10.1038/nmeth.4193 (2017).
- 403 45 Zhang, K. Gctf: Real-time CTF determination and correction. *J Struct Biol* **193**, 1-12,  
404 doi:10.1016/j.jsb.2015.11.003 (2016).
- 405 46 Zivanov, J. *et al.* New tools for automated high-resolution cryo-EM structure determination in  
406 RELION-3. *Elife* **7**, doi:10.7554/eLife.42166 (2018).
- 407 47 Kucukelbir, A., Sigworth, F. J. & Tagare, H. D. Quantifying the local resolution of cryo-EM density  
408 maps. *Nat Methods* **11**, 63-65, doi:10.1038/nmeth.2727 (2014).
- 409 48 Pettersen, E. F. *et al.* UCSF Chimera—A Visualization System for Exploratory Research and  
410 Analysis. *J Comput Chem* **25**, 1605-1612, doi:10.1002/jcc.20084 (2004).
- 411 49 Adams, P. D. *et al.* PHENIX: A comprehensive Python-based system for macromolecular structure  
412 solution. *Acta Crystallographica Section D: Biological Crystallography* **66**, 213-221,  
413 doi:10.1107/S0907444909052925 (2010).
- 414 50 Emsley, P., Lohkamp, B., Scott, W. G. & Cowtan, K. Features and development of Coot. *Acta*  
415 *Crystallographica Section D: Biological Crystallography* **66**, 486-501,  
416 doi:10.1107/S0907444910007493 (2010).
- 417

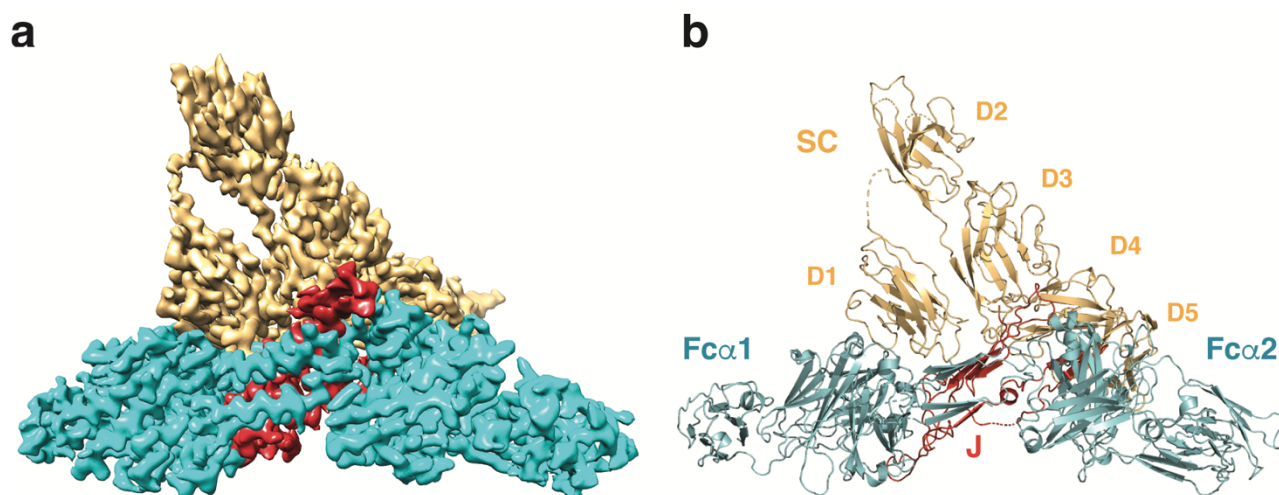

418

419 **Figure 1. Cryo-EM structure of the human Fc $\alpha$ -J-SC complex.**

420 **a.** The cryo-EM density map of Fc $\alpha$ -J-SC reconstructed at 3.15 Å resolution. The regions corresponding to  
421 Fc $\alpha$ , J-chain, and SC are shown in cyan, red, and gold, respectively. The same color scheme is used in all  
422 figures unless otherwise indicated.

423 **b.** The structural model of Fc $\alpha$ -J-SC. The five immunoglobulin-like domains in SC are indicated as D1-D5.

424

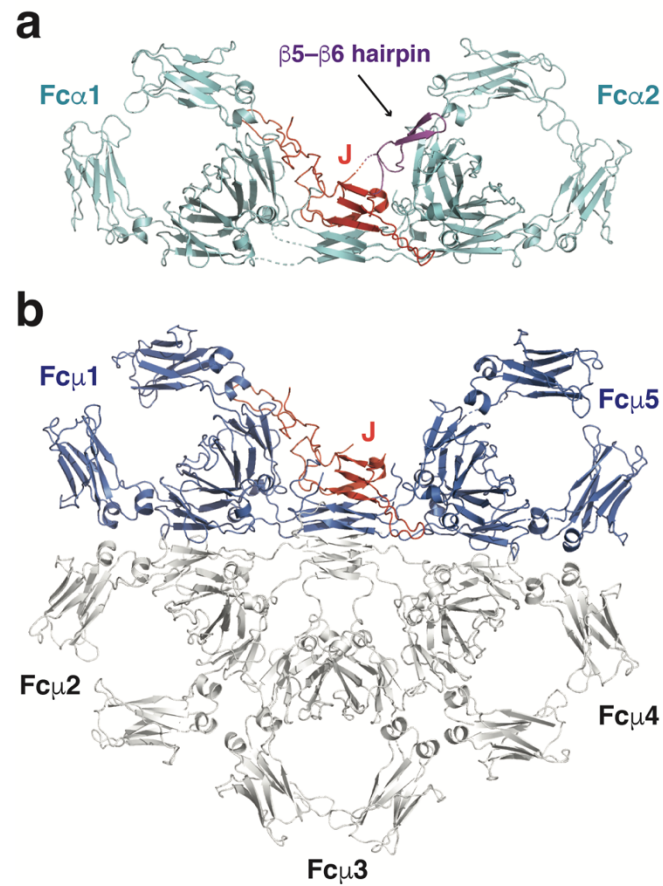

425

426

427 **Figure 2. Structure of dIgA core and its comparison with pIgM.**

428 **a.** Overall structure of the dimeric Fc $\alpha$  in complex with the J-chain. The  $\beta 5-\beta 6$  hairpin of the J-chain that is  
429 disordered in the Fc $\mu$ -J structure is highlighted in magenta.

430 **b.** Structure of the pentameric Fc $\mu$  in complex with the J-chain. Fc $\mu$ 1 and Fc $\mu$ 5 are shown in blue, whereas

431 Fc $\mu$ 2-4 are shown in white.

432

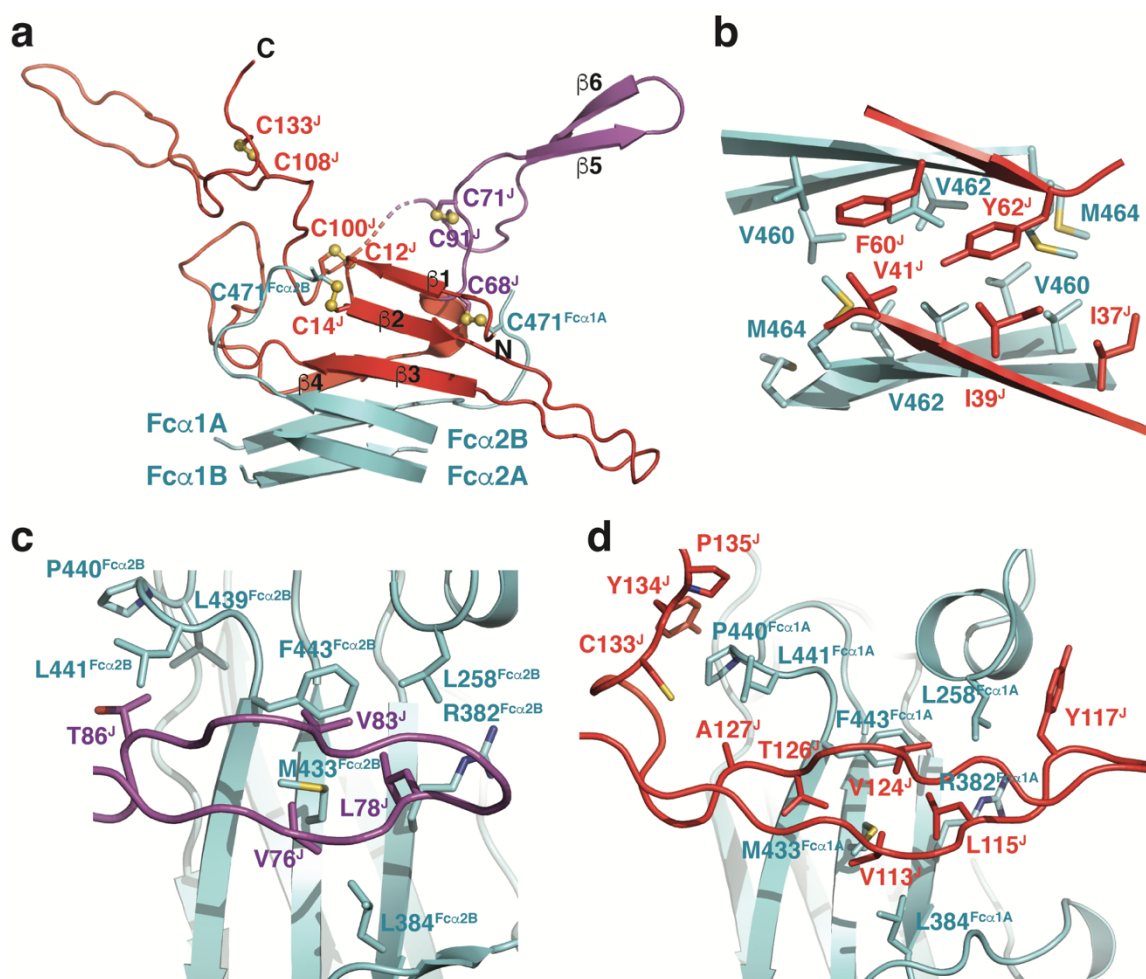

433

434 **Figure 3. The interactions between the J-chain and Fc $\alpha$ .**

435 a. Overall structure of the J-chain. The sulfur atoms in the Cys residues that form disulfide bonds are

436 depicted in orange spheres. The  $\beta$ -strands in the J-chain and Fc $\alpha$  tailpieces are indicated.

437 b. Interactions between two J-chain strands and the Fc $\alpha$  tailpieces.

438 c. Interactions between the  $\beta 5$ - $\beta 6$  hairpin of the J-chain and the  $C\alpha 2$ - $C\alpha 3$  junction of Fc $\alpha 2B$ .

439 d. Interactions between the C-terminal hairpin of the J-chain and the  $C\alpha 2$ - $C\alpha 3$  junction of Fc $\alpha 1A$ .

440



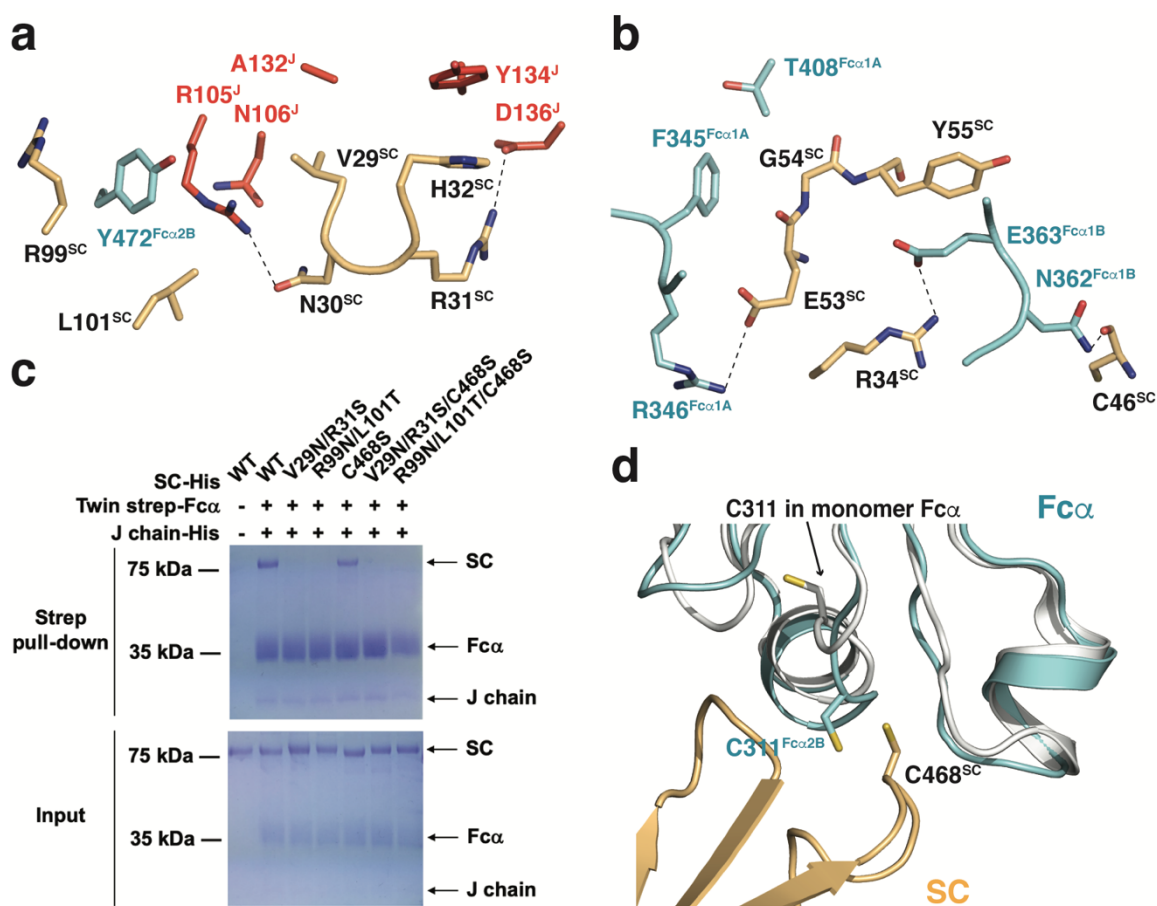

441

442 **Figure 4. Interaction between dIgA and SC.**

443 **a.** Interactions between Fcα-J and SC at the CDR1 and CDR3 regions. Polar interactions are indicated by  
 444 dashed lines.

445 **b.** Direct interactions between Fcα and SC.

446 **c.** SC mutants display reduced interactions with Fcα-J.

447 **d.** The structure of the Fcα monomer (PDB ID: 2QEJ), shown in white, is overlaid onto Fcα2B in the Fcα-J-  
 448 SC structure. Compared to Cys311 in the Fcα monomer, Cys311<sup>Fcα2B</sup> flips out and can readily form a  
 449 disulfide bond with Cys468<sup>SC</sup>.

450

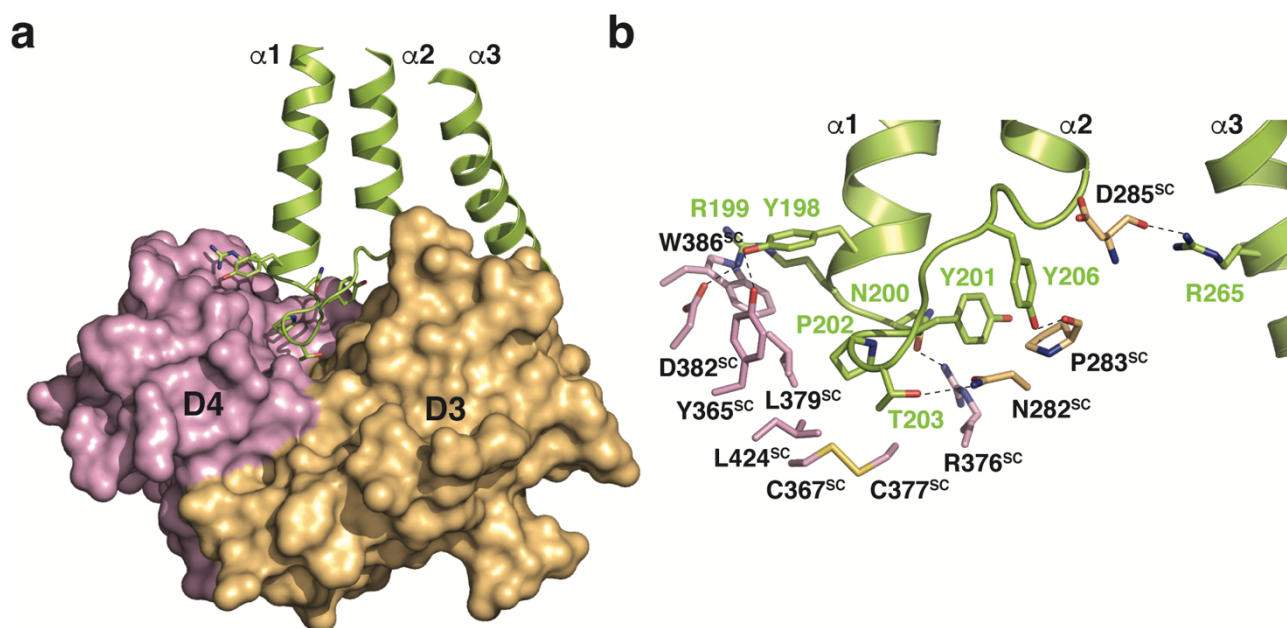

451

452 **Figure 5. Interaction between SC and SpsA.**

453 **a.** Overall structure of the D3-D4 domains of SC in complex SpsA<sup>NTD</sup>. The D3-D4 domains of SC are shown  
454 in a surface representation, with D3 and D4 in gold and purple, respectively. SpsA<sup>NTD</sup> is shown in lemon, and  
455 the side chains of the YRNYPT hexapeptide are depicted.

456 **b.** Detailed interactions between SC and SpsA.

457

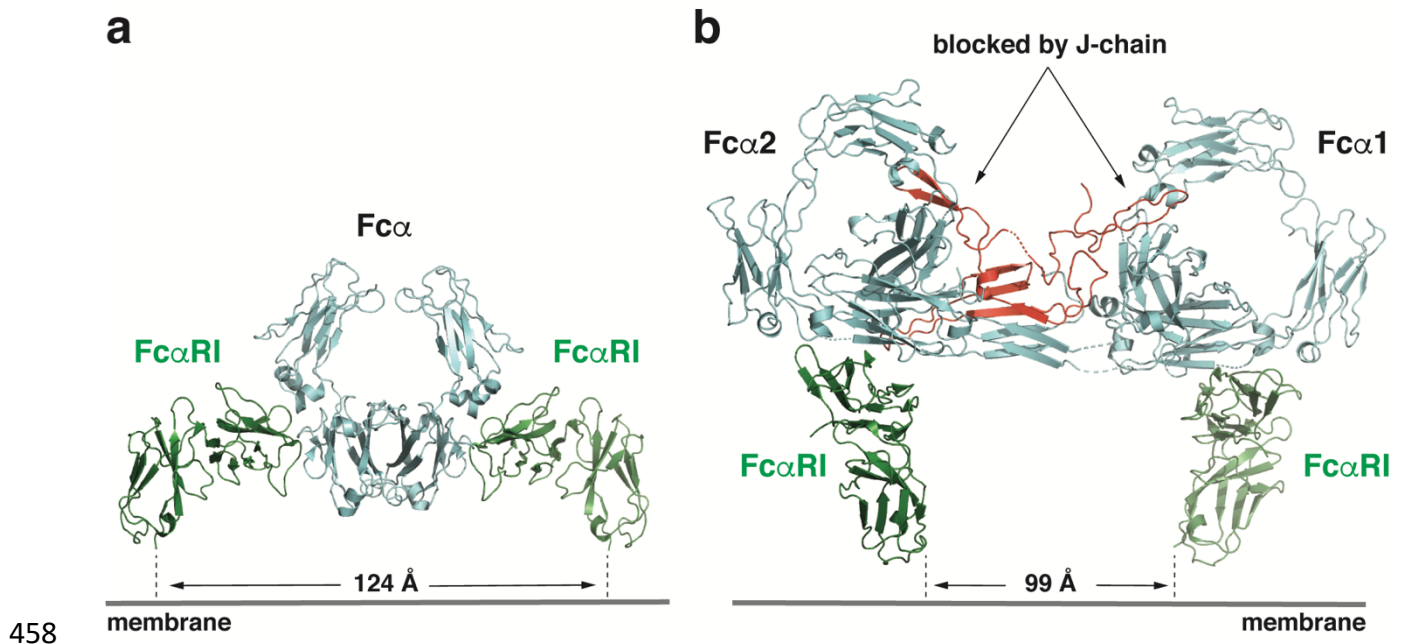

**Figure 6. A hypothetical model of the dIgA-Fc $\alpha$ RI complex.**

**a.** Crystal structure of the 2:1 Fc $\alpha$ RI:Fc $\alpha$  complex (PDB ID: 1OW0). Fc $\alpha$ RI is shown in green. The distance between the C-terminal ends of the two Fc $\alpha$ RI molecules is indicated.

**b.** In the Fc $\alpha$ -J structure, only one side of the Fc $\alpha$ RI-binding site would be available. The other side is occupied by the J-chain and therefore not exposed for interacting with Fc $\alpha$ RI.

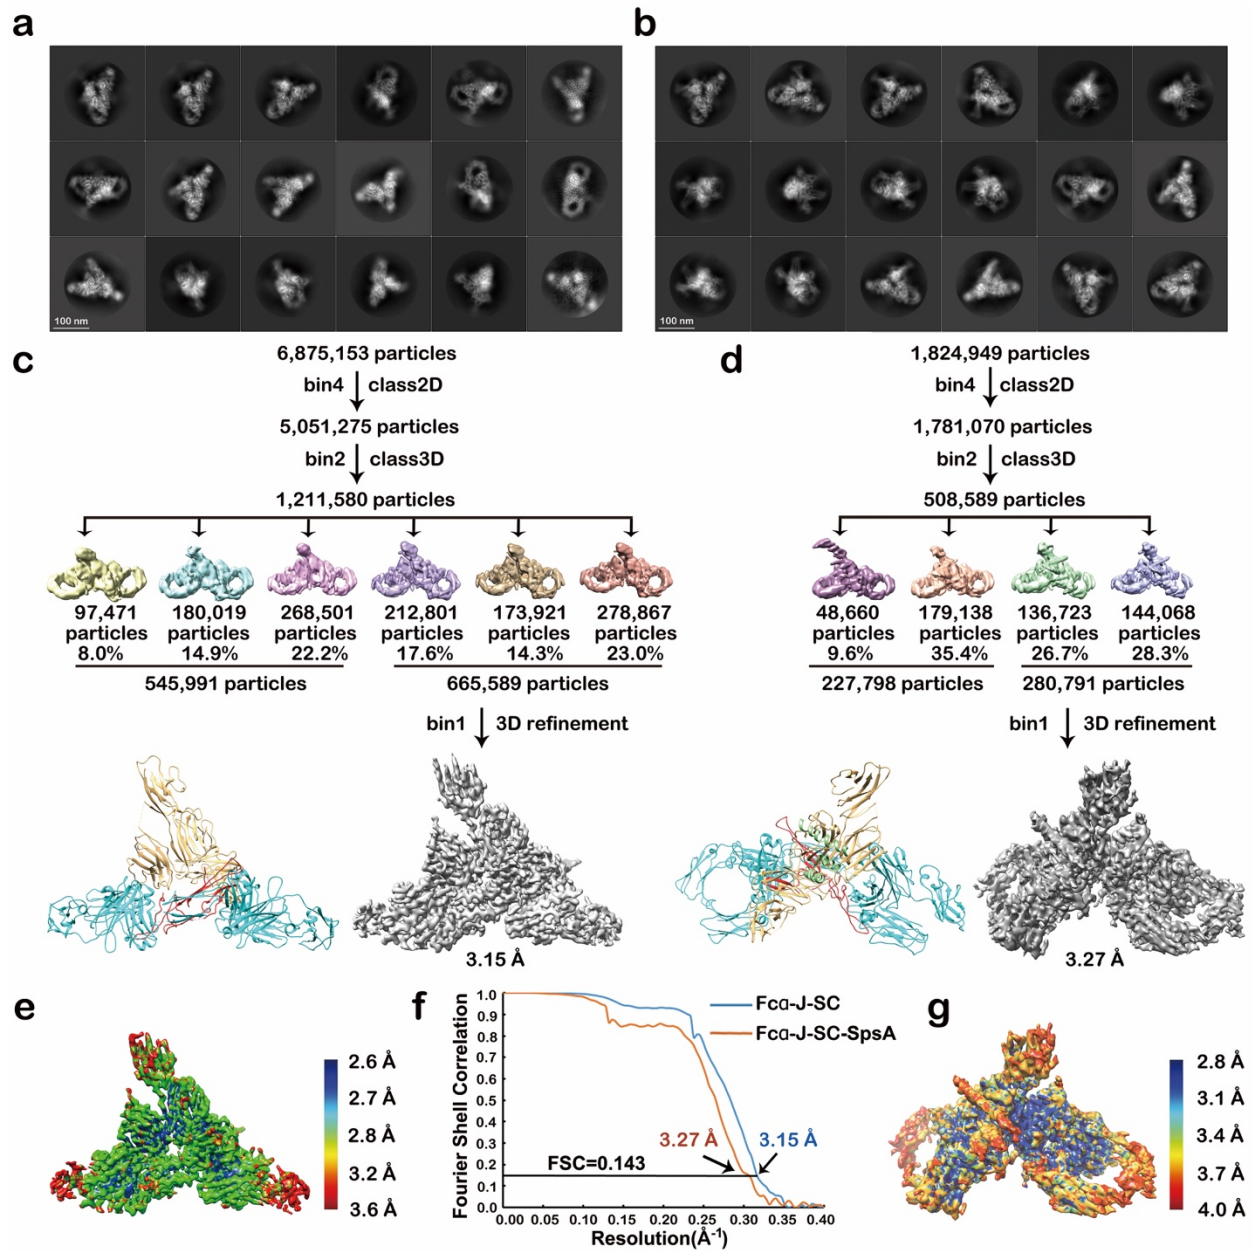

**Figure S1. Workflows for cryo-EM 3D reconstructions.**

- a. Representative 2D classes for the Fc $\alpha$ -J-SC complex.
- b. Representative 2D classes for the Fc $\alpha$ -J-SC-SpsA complex.
- c. Flow chart of data processing for the Fc $\alpha$ -J-SC complex.
- d. Flow chart of data processing for the Fc $\alpha$ -J-SC-SpsA complex.
- e. Local resolution estimation of the final map of Fc $\alpha$ -J-SC analyzed by ResMap.
- f. Gold standard Fourier shell correlation (FSC) curves with estimated resolutions.
- g. Local resolution estimation of the final map of Fc $\alpha$ -J-SC-SpsA.

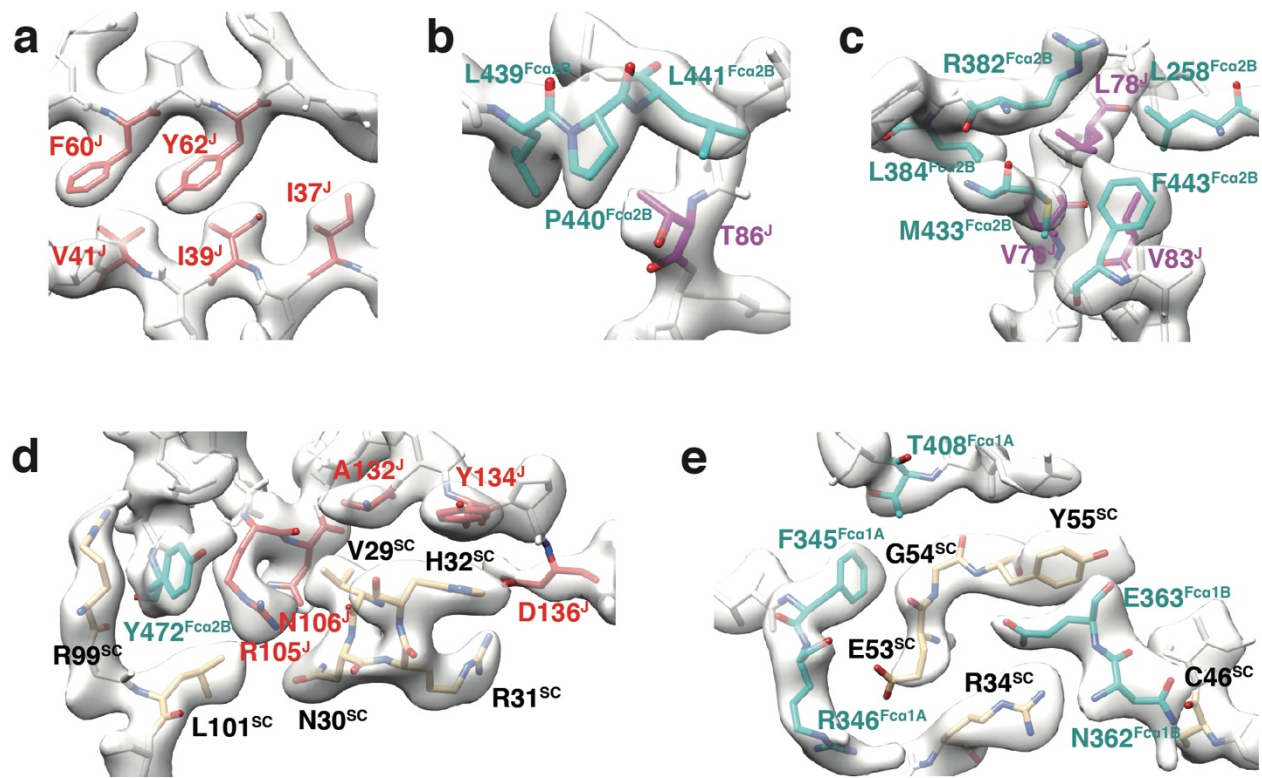

Figure S2. Density maps of selected regions in Fc $\alpha$ -J-SC.

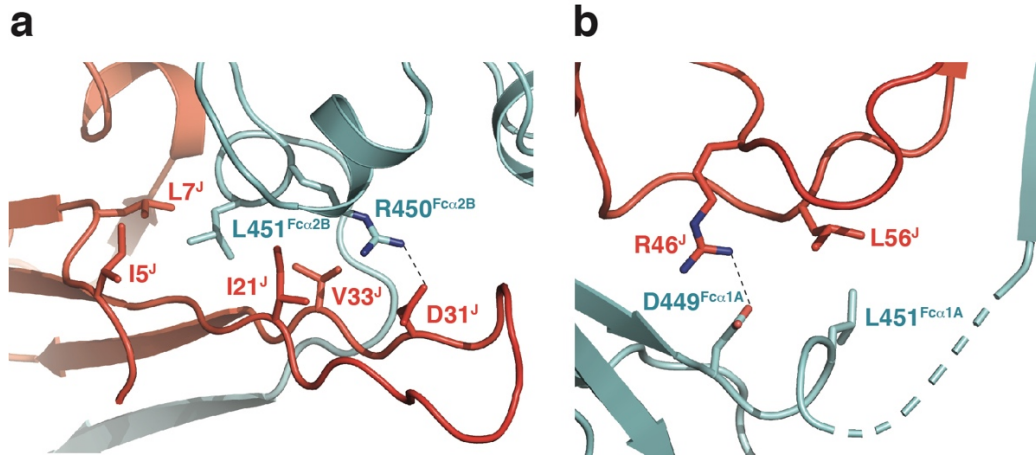

**Figure S3. Interactions between the J-chain and Fc $\alpha$ .**

**a.** Interactions between the J-chain  $\beta$ 2- $\beta$ 3 loop and the Fc $\alpha$ 2B C $\alpha$ 3-tailpiece junction.

**b.** Interactions between the J-chain  $\beta$ 3- $\beta$ 4 loop and the Fc $\alpha$ 1A C $\alpha$ 3-tailpiece junction.

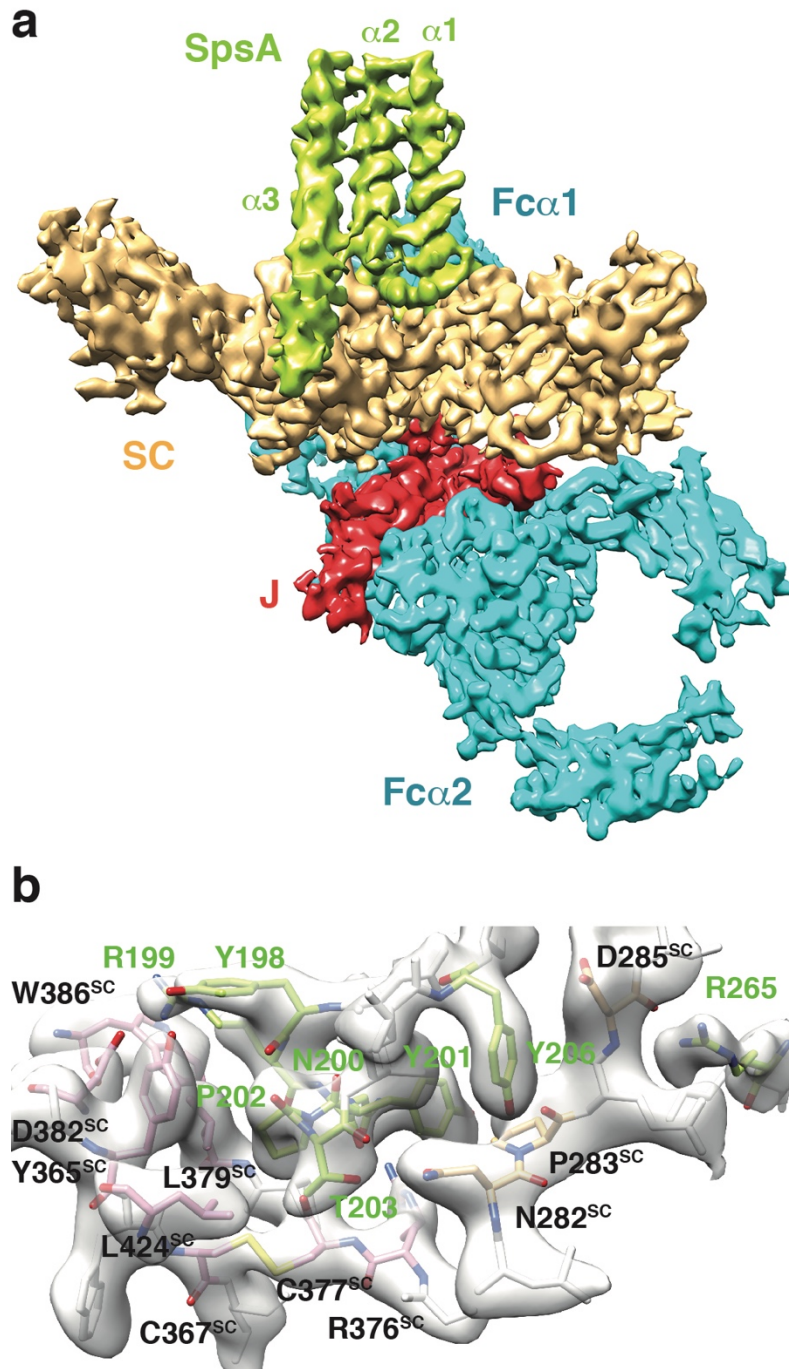

**Figure S4. Cryo-EM structure of the Fc $\alpha$ -J-SC-SpsA complex.**

**a.** The cryo-EM density map of Fc $\alpha$ -J-SC-SpsA.

**b.** Density maps of the SC-SpsA interface.

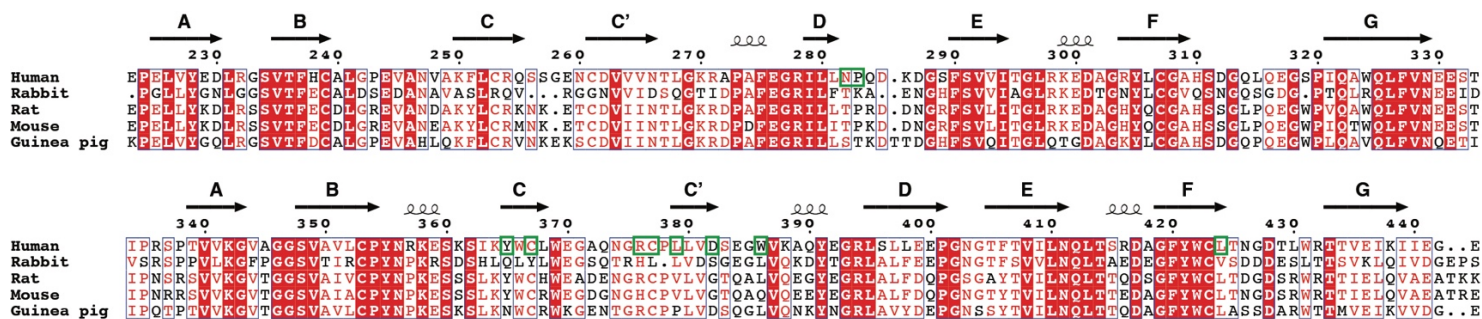

**Figure S5. Sequence alignment of the D3-D4 domains of pIgR/SC from human and common laboratory animals.**

Residues in human pIgR/SC that are involved in binding to SpsA are highlighted in green boxes.



**Table S1. Cryo-EM data collection, processing and validation statistics**

|                                                                        | Fc $\alpha$ -J-SC                        | Fc $\alpha$ -J-SC-SpsA                   |
|------------------------------------------------------------------------|------------------------------------------|------------------------------------------|
| <b>Data collection and processing</b>                                  |                                          |                                          |
| Voltage (kV)                                                           | 300                                      | 300                                      |
| Microscope                                                             | FEI Titan Krios G3                       | FEI Titan Krios G3                       |
| Camera                                                                 | K2 Summit (Gatan)                        | K2 Summit (Gatan)                        |
| Magnification (calibrated)                                             | 165,000X                                 | 165,000X                                 |
| Electron exposure (e <sup>-</sup> /Å <sup>2</sup> )                    | 59.74                                    | 59.74                                    |
| Exposure rate (e <sup>-</sup> /Å <sup>2</sup> /s)                      | 11.668                                   | 11.668                                   |
| Number of frames collected per micrograph                              | 32                                       | 32                                       |
| Energy filter slit width (eV)                                          | 20                                       | 20                                       |
| Automation software                                                    | SerialEM                                 | SerialEM                                 |
| Defocus range (μm)                                                     | -0.8 to -1.6                             | -0.8 to -1.6                             |
| Pixel size (Å)                                                         | 0.828                                    | 0.828                                    |
| Micrographs used                                                       | 13,929                                   | 7,177                                    |
| Estimated accuracy of translation/rotations                            | 0.816 pixels/1.723°                      | 0.821 pixels/1.553°                      |
| Symmetry imposed                                                       | C1                                       | C1                                       |
| Initial particle images                                                | 6,875,153                                | 1,824,949                                |
| Final particle images                                                  | 665,589                                  | 280,791                                  |
| Resolution at 0.143                                                    |                                          |                                          |
| FSC of masked reconstruction (Å)                                       | 3.15                                     | 3.27                                     |
| Resolution at 0.5                                                      |                                          |                                          |
| FSC of masked reconstruction (Å)                                       | 3.52                                     | 3.76                                     |
| Resolution range due to anisotropy (directional FSC $\pm 1\sigma$ , Å) | 2.9-3.2                                  | 3.0-3.7                                  |
| Map sharpening B factor (Å <sup>2</sup> )                              | -98                                      | -85                                      |
| <b>Refinement</b>                                                      |                                          |                                          |
| Initial model used (PDB code)                                          | 1OW0, 6KXS                               | 1OW0, 6KXS, 1W9R                         |
| Refinement package                                                     | Phenix (Real-space refinement at 3.15 Å) | Phenix (Real-space refinement at 3.27 Å) |
| Map-model CC                                                           |                                          |                                          |
| CC_mask                                                                | 0.84                                     | 0.81                                     |
| CC_box                                                                 | 0.72                                     | 0.75                                     |
| CC_peaks                                                               | 0.69                                     | 0.68                                     |
| CC_volume                                                              | 0.80                                     | 0.78                                     |
| Model composition                                                      |                                          |                                          |
| Non-hydrogen atoms                                                     | 11,802                                   | 12,299                                   |
| Protein residues                                                       | 1,535                                    | 1,595                                    |
| B factors (Å <sup>2</sup> )                                            | 54.86                                    | 40.76                                    |
| R.m.s. deviations                                                      |                                          |                                          |
| Bond lengths (Å)                                                       | 0.006                                    | 0.014                                    |
| Bond angles (°)                                                        | 0.853                                    | 1.221                                    |
| Validation                                                             |                                          |                                          |

|                        |       |       |
|------------------------|-------|-------|
| MolProbity score       | 2.51  | 2.88  |
| Clashscore             | 4.61  | 7.04  |
| Poor rotamers (%)      | 9.61  | 14.04 |
| Ramachandran plot      |       |       |
| Favored (%)            | 90.66 | 86.90 |
| Allowed (%)            | 9.34  | 13.04 |
| Disallowed (%)         | 0.00  | 0.06  |
| C $\beta$ outliers (%) | 0.00  | 0.00  |
| CaBLAM outliers (%)    | 5.87  | 7.43  |

---
